# Supplementary material
Source: PubMed Central journal article supplement (PMC5512783)

**LMP1 of EBV**

**Positive**

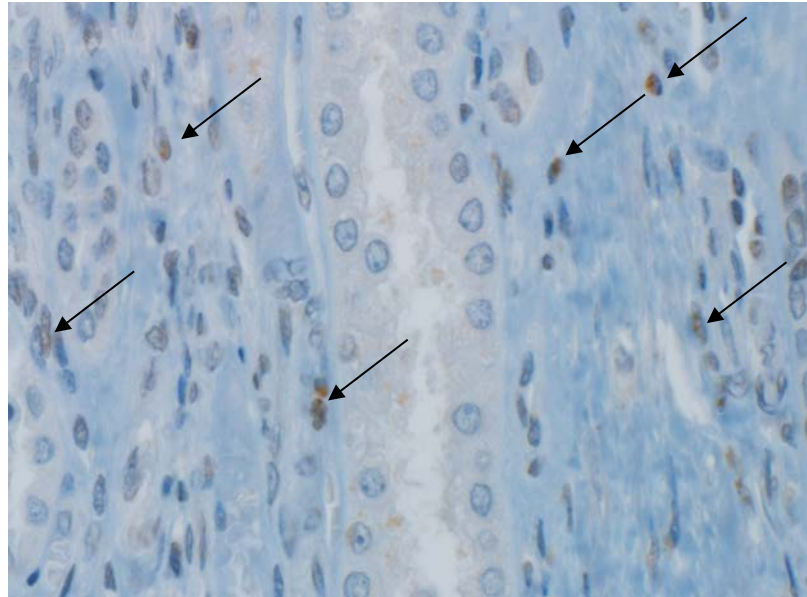

**Negative**

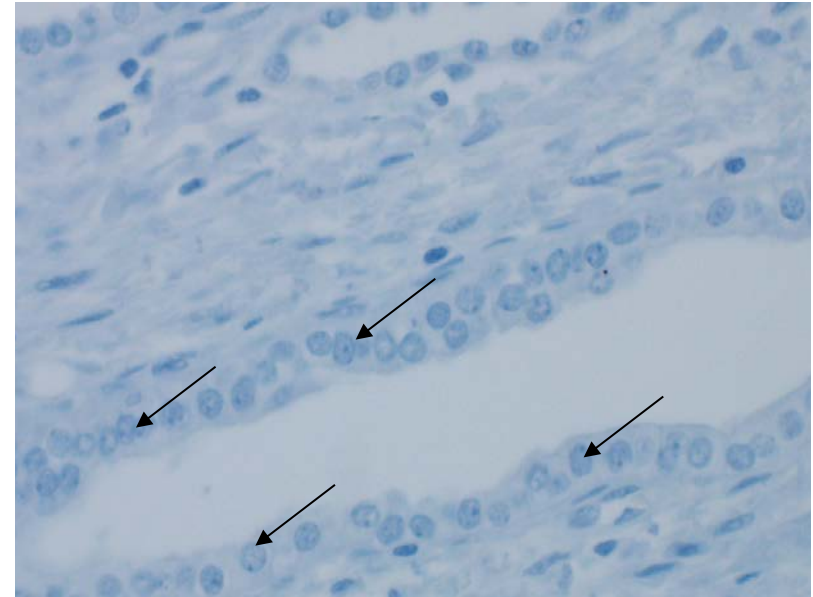

**Fascin**

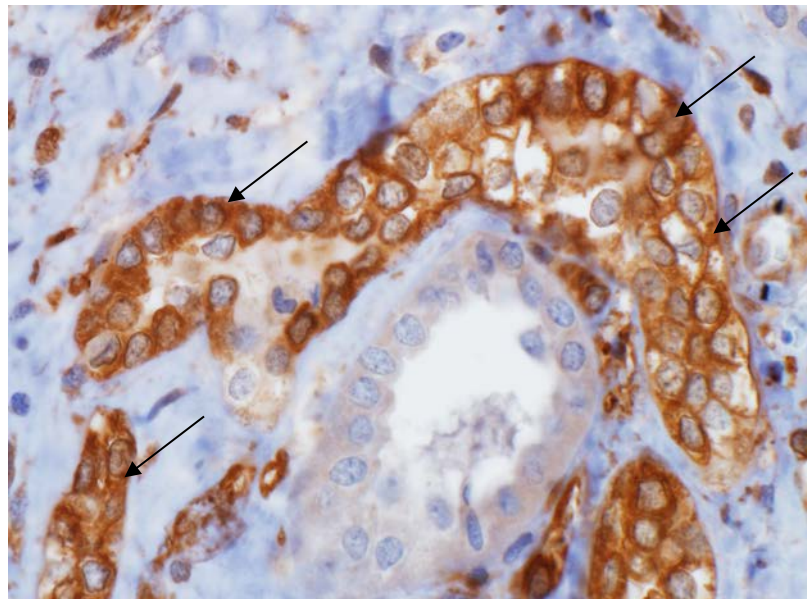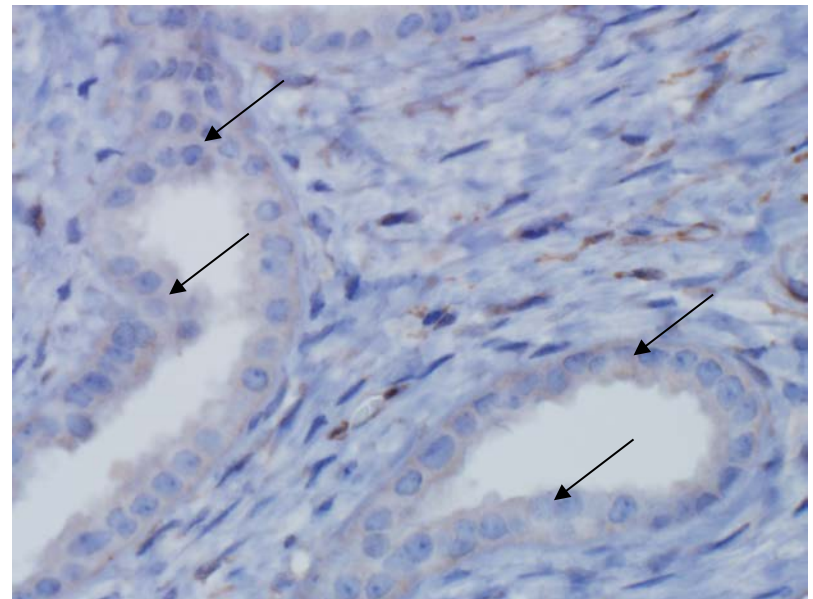

Supplement: khvi-13-07-1302046-s001.pdf [file khvi-13-07-1302046-s001.pdf]
